# Supplementary material for: Atypical natural killer T-cell receptor recognition of CD1d–lipid antigens
Source: PubMed Central journal article supplement (PMC4756352; doi:10.1038/ncomms10570), 2016-02-15
Supplement: ncomms10570-s1.pdf [file ncomms10570-s1.pdf]

**“Atypical Natural Killer T-cell receptor recognition of CD1d-lipid antigens”  
supplementary Information.**

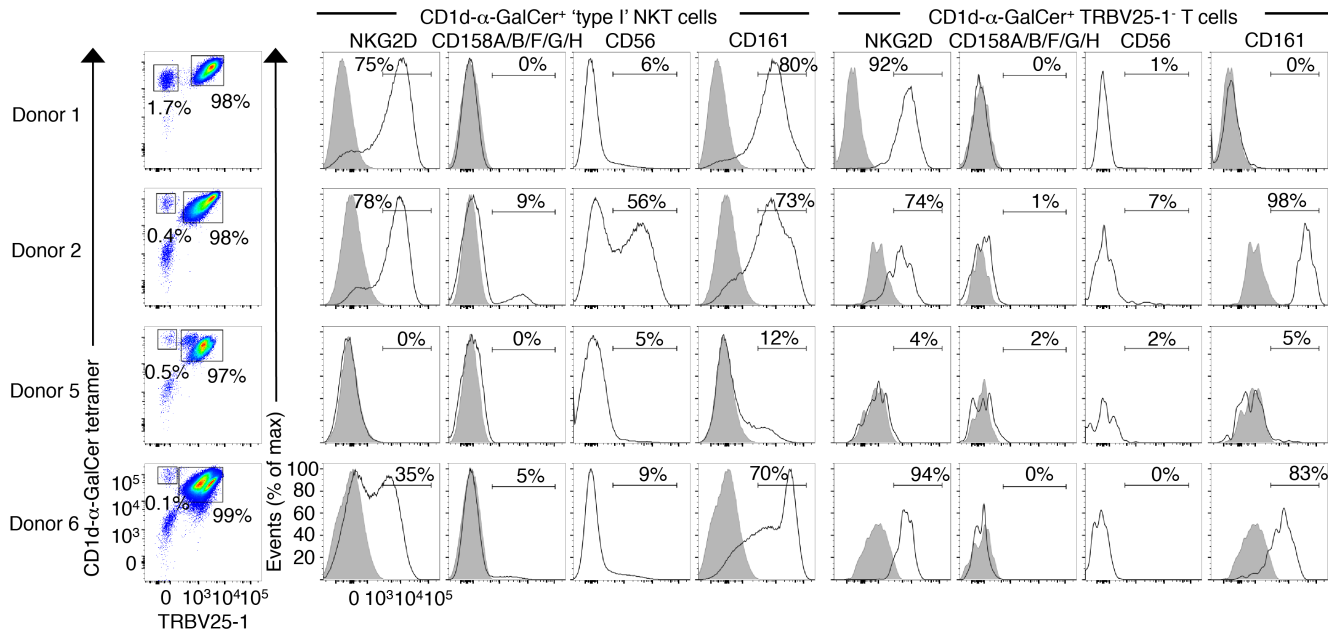

**Supplementary Figure 1. Phenotypic analysis of TRBV25-1<sup>+</sup> and TRBV25-1<sup>-</sup> CD1d-α-GalCer-reactive cells.** Four donors with a detectable population of TRBV25-1<sup>-</sup> cells after enrichment and *in vitro* expansion of CD1d-α-GalCer tetramer<sup>+</sup> TRDV1<sup>-</sup> γδTCR<sup>-</sup> cells from the blood were analysed for their expression of a panel of cell surface markers. White histograms depict staining for NKG2D, CD158A/B/F/G/H, CD56 and CD161 on TRBV25-1<sup>+</sup> ‘type I’ NKT cells (left-hand columns) and TRBV25-1<sup>-</sup> cells (right-hand columns), overlaid with isotype controls (gray histograms). Numbers indicate percentage of cells within the indicated gate. Data are representative of two independent experiments for donors 1 and 2, and one experiment for donors 5 and 6.

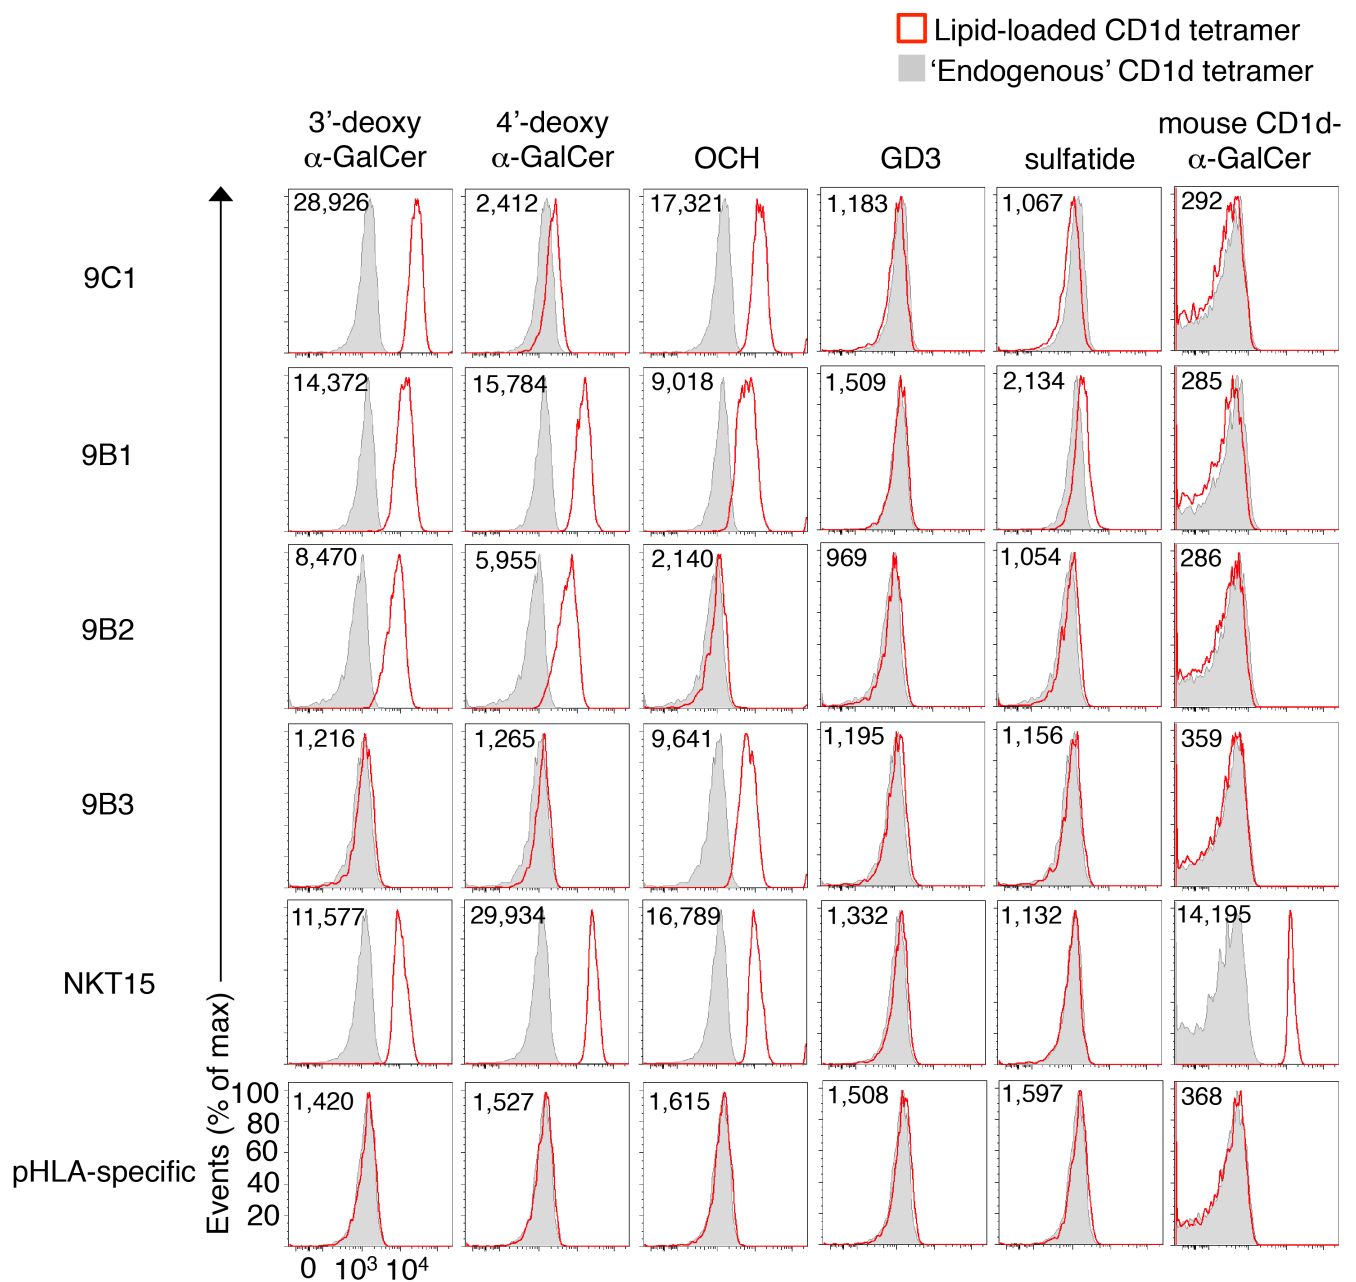

**Supplementary Figure 2. CD1d tetramer staining of atypical NKT cell lines.** Histograms depicting human CD1d-lipid antigen or mouse CD1d- $\alpha$ -GalCer ( $C_{24:1}$  analogue) tetramer staining (red histograms) of CD3<sup>+</sup> Jurkat T cell lines transduced with the 9C1, 9B1, 9B2, 9B3 atypical NKT cell TCRs, or with the NKT15 type I NKT cell TCR or an irrelevant pHLA-specific TCR control, overlaid with ‘unloaded’ tetramers (grey histograms). Numbers in each histogram represent CD1d-lipid tetramer mean fluorescence intensity. Data are representative of one experiment.

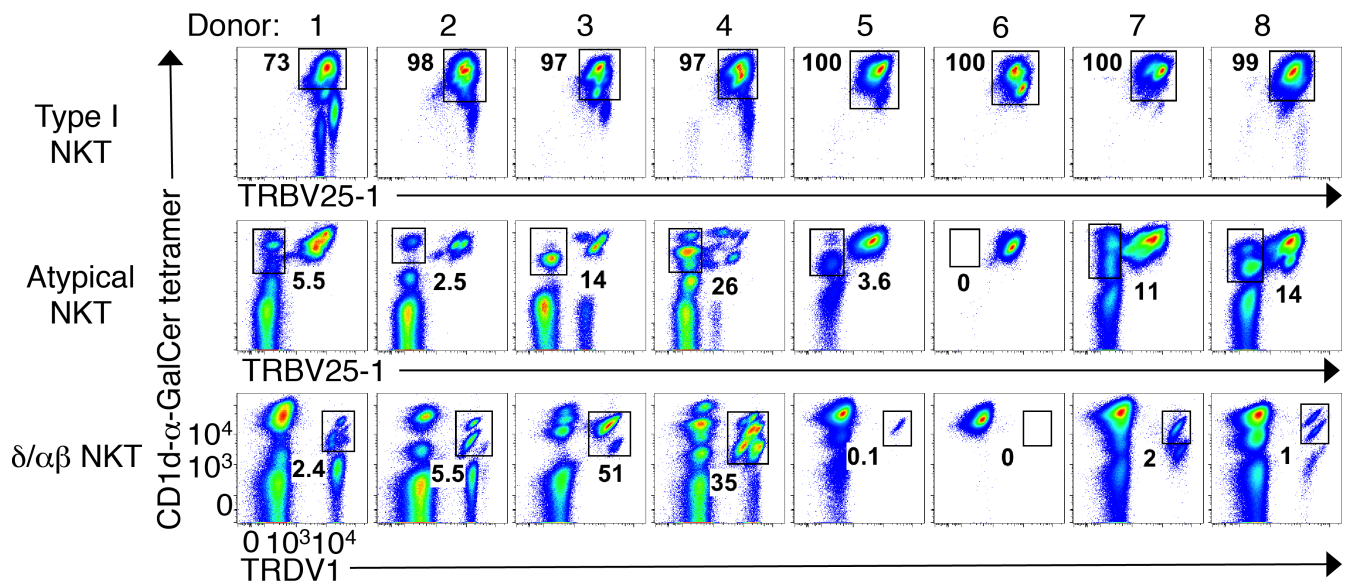

**Supplementary Figure 3. Enrichment of Type I, atypical and  $\delta/\alpha\beta$  NKT cells.** Density plots show gated subsets of type I ( $\text{TRBV25-1}^+ \text{TRDV1}^-$ ), atypical ( $\text{TRBV25-1}^- \text{TRDV1}^-$ ) and  $\delta/\alpha\beta$  ( $\text{TRDV1}^+$ ) NKT cell subsets amongst  $\text{CD1d-}\alpha\text{-GalCer tetramer}^+ \text{CD3}^+ \gamma\delta\text{TCR}^-$  cells that were enriched using magnetic beads and cell sorting, and subsequently expanded in vitro. Numbers on plots represent the percentage of gated events. Data shown was performed over 2 independent experiments.

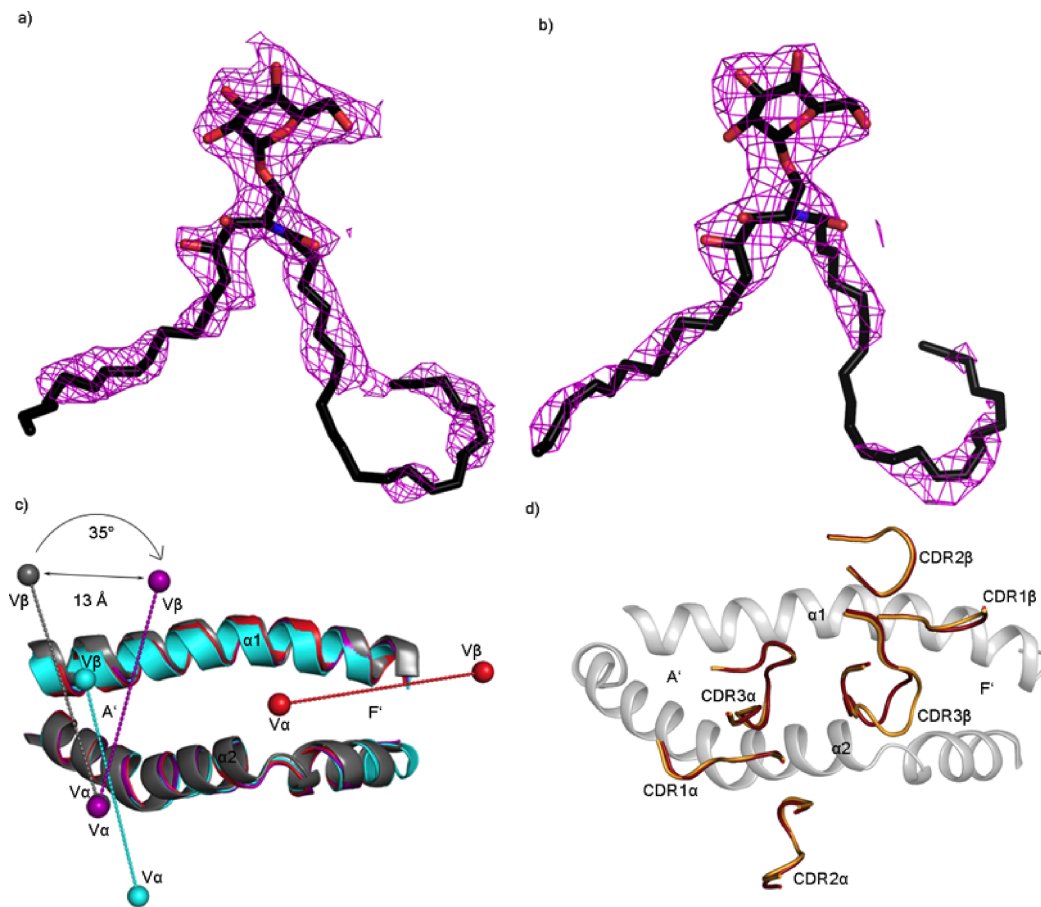

**Supplementary Figure 4. Electron density map corresponding to  $\alpha$ -GalCer.** (a) Fo-Fc electron density maps contoured at the  $2.5\sigma$  level of the lipid antigen  $\alpha$ -GalCer in (a) the 9C1 TCR-CD1d- $\alpha$ -GalCer ternary complex and (b) the 9B2 TCR-CD1d- $\alpha$ -GalCer ternary complex. (c) Superposition of the 9C1 TCR-CD1d- $\alpha$ -GalCer (magenta), 9B2 TCR-CD1d- $\alpha$ -GalCer (grey), NKT15 TCR-CD1d- $\alpha$ -GalCer (red) and XV19 TCR-CD1d-sulfatide (cyan) ternary complexes. For clarity, only the  $\alpha 1$ - and  $\alpha 2$ - helices of CD1d and the center of mass (spheres) of the respective TCRs are shown. (d) Superposition of the unligated 9C1 TCR (in yellow) and the 9C1 TCR in complex with CD1d- $\alpha$ -GalCer (in red). For clarity, only the CDRs are shown.

**Supplementary Table 1. Data collection and refinement statistics**

|                                      | <b>9B2 TCR-CD1d-<math>\alpha</math>-GalCer</b>                 | <b>9C1 TCR-CD1d-<math>\alpha</math>-GalCer</b>                          | <b>9C1 TCR</b>                                                                  |
|--------------------------------------|----------------------------------------------------------------|-------------------------------------------------------------------------|---------------------------------------------------------------------------------|
| <b>Data collection</b>               |                                                                |                                                                         |                                                                                 |
| Temperature                          | 100K                                                           | 100K                                                                    | 100K                                                                            |
| Resolution limits (Å)                | 65.37-3.1 (3.27-3.1)                                           | 44.80-2.48 (2.58-2.48)                                                  | 37.28-1.38 (1.45-1.38)                                                          |
| Space Group                          | P2 <sub>1</sub> 2 <sub>1</sub> 2 <sub>1</sub>                  | C2                                                                      | P2 <sub>1</sub>                                                                 |
| Cell dimensions (Å)                  | $a=56.4, b=76.1, c=255.7$<br>$\alpha=\beta=\gamma=90.00^\circ$ | $a=210, b=46.3, c=124.7$<br>$\alpha=\gamma=90.00^\circ \beta=120^\circ$ | $a=43.1, b=73.1, c=65.6,$<br>$\alpha=\gamma=90.00^\circ$<br>$\beta=94.49^\circ$ |
| Total N <sup>o</sup> . observations  | 73170 (9779)                                                   | 168213 (36325)                                                          | 338006 (46559)                                                                  |
| N <sup>o</sup> . unique observations | 19363 (2732)                                                   | 18343 (3953)                                                            | 83083 (11965)                                                                   |
| Multiplicity                         | 3.8 (3.6)                                                      | 4.6 (4.6)                                                               | 4.1 (3.9)                                                                       |
| Data completeness                    | 94.2 (92.6)                                                    | 99.5 (97.3)                                                             | 99.7 (98.8)                                                                     |
| Wilson B-factors (Å <sup>2</sup> )   | 61.9                                                           | 51.8                                                                    | 15.3                                                                            |
| I/ $\sigma$ <sub>I</sub>             | 7.5 (2.4)                                                      | 8.2 (1.6)                                                               | 9.8 (2.1)                                                                       |
| R <sub>p,i,m</sub> <sup>1</sup> (%)  | 8.6 (35.6)                                                     | 4.5 (30.9)                                                              | 4 (30.4)                                                                        |
| <b>Refinement statistics</b>         |                                                                |                                                                         |                                                                                 |
| R <sub>factor</sub> <sup>2</sup> (%) | 19.4                                                           | 20                                                                      | 19.6                                                                            |
| R <sub>free</sub> <sup>3</sup> (%)   | 25.6                                                           | 24.9                                                                    | 21.7                                                                            |
| Non hydrogen atoms                   |                                                                |                                                                         |                                                                                 |
| - Protein                            | 6388                                                           | 6533                                                                    | 3585                                                                            |
| - Water                              | -                                                              | 170                                                                     | 449                                                                             |
| - Heterogen                          | 86                                                             | 257                                                                     | -                                                                               |
| Ramachandran plot (%)                |                                                                |                                                                         |                                                                                 |
| - Most favoured                      | 93.95                                                          | 96                                                                      | 97.65                                                                           |
| - Allowed                            | 6.05                                                           | 4                                                                       | 2.35                                                                            |
| Molprobity Score                     | 99 <sup>th</sup> percentile                                    | 96 <sup>th</sup> percentile                                             | 97 <sup>th</sup> percentile                                                     |
| B-factors (Å <sup>2</sup> )          |                                                                |                                                                         |                                                                                 |
| - Average main chain                 | 64.8                                                           | 60                                                                      | 17.5                                                                            |
| - Average side chain                 | 71.5                                                           | 67.7                                                                    | 24                                                                              |
| rmsd bonds (Å)                       | 0.008                                                          | 0.008                                                                   | 0.010                                                                           |
| rmsd angles (°)                      | 0.94                                                           | 1.0                                                                     | 1.10                                                                            |

<sup>1</sup>  $R_{p,i,m} = \sum_{hkl} [1/(N-1)]^{1/2} \sum_i |I_{hkl,i} - \langle I_{hkl} \rangle| / \sum_{hkl} \langle I_{hkl} \rangle$

<sup>2</sup>  $R_{factor} = (\sum ||F_o| - |F_c||) / (\sum |F_o|)$  - for all data except as indicated in footnote 3.

<sup>3</sup> 5% of data was used for the R<sub>free</sub> calculation

Values in parentheses refer to the highest resolution bin.

**Supplementary Table 2. 9C1 TCR contacts with  $\alpha$ -GalCer and CD1d.**

| <b>TCR gene</b> | <b>TCR residues</b>   | <b>CD1d residues</b>                    | <b>Bond type</b>      |
|-----------------|-----------------------|-----------------------------------------|-----------------------|
| CDR1 $\alpha$   | Tyr31                 | Trp153, Glu156                          | VDW                   |
| CDR1 $\alpha$   | Ala29                 | Trp160                                  | VDW                   |
| CDR2 $\alpha$   | Ser52                 | Glu156                                  | VDW                   |
| CDR2 $\alpha$   | Ser52-O $\gamma$      | Glu156-O $\epsilon$ 2                   | HB                    |
| CDR2 $\alpha$   | Ser52-O $\gamma$      | Glu156-O $\epsilon$ 1                   | HB                    |
| CDR3 $\alpha$   | Thr109                | Trp153, Glu156, Thr157, Trp160          | VDW                   |
| CDR3 $\alpha$   | Thr109-O              | Thr157-O $\gamma$ 1                     | HB                    |
| CDR3 $\alpha$   | Gly110                | His68, Ile69, Trp153, Thr157            | VDW                   |
| CDR3 $\alpha$   | Phe111                | Thr65, His68, Trp153                    | VDW                   |
| CDR3 $\alpha$   | Phe111-O              | Trp153- N $\epsilon$ 1                  | HB                    |
| CDR3 $\alpha$   | Gln112                | His68, Val72, Trp153                    | VDW                   |
| CDR3 $\alpha$   | Gln112-O $\epsilon$ 1 | His68-N $\epsilon$ 2                    | HB                    |
| CDR1 $\beta$    | Val30                 | Arg79                                   | VDW                   |
| CDR2 $\beta$    | Gln57-O $\epsilon$ 1  | Ser76-O $\gamma$                        | HB                    |
| CDR2 $\beta$    | Gln57                 | Arg79                                   | VDW                   |
| CDR2 $\beta$    | Asn58-O $\delta$ 1    | Arg79-N $\eta$ 1                        | HB                    |
| CDR2 $\beta$    | Asn58                 | Arg79                                   | VDW                   |
| CDR3 $\beta$    | Leu111                | Trp153                                  | VDW                   |
| FW $\beta$      | Leu66                 | His68, Arg71, Val72, Ser75              | VDW                   |
| FW $\beta$      | Asp67                 | His68                                   | VDW                   |
| <b>TCR gene</b> | <b>TCR residues</b>   | <b><math>\alpha</math>-GalCer atoms</b> | <b>Bond type</b>      |
| CDR1 $\alpha$   | Tyr31-O $\eta$        | O3A                                     | Water mediated H-bond |
| CDR3 $\alpha$   | Gln112                | C6A, O6A                                | VDW                   |
| CDR3 $\alpha$   | Gln112-N $\epsilon$ 2 | O6A                                     | HB                    |
| CDR1 $\beta$    | Ser31-O $\gamma$      | O4A                                     | Water mediated H-bond |
| CDR2 $\beta$    | Gln57                 | C5M, C1A, O5A, C6A, O6A                 | VDW                   |
| CDR2 $\beta$    | Gln57-N $\epsilon$ 2  | O6A                                     | HB                    |
| CDR3 $\beta$    | Arg109                | C3A, O3A, C4A, O4A                      | VDW                   |
| CDR3 $\beta$    | Arg109-O              | O3A, O4A                                | HB                    |
| CDR3 $\beta$    | Arg109-O              | O3A                                     | Water mediated H-bond |
| CDR3 $\beta$    | Leu111                | O4A                                     | VDW                   |
| FW $\beta$      | Tyr55                 | O6A                                     | VDW                   |

HB: Hydrogen bond, VDW: Van der Waals, SB: salt bridge. Cut-off at 4 Å for VDW interactions and 3.5 Å for HB. FW, framework.

**Supplementary Table 3. 9B2 TCR contacts with  $\alpha$ -GalCer and CD1d**

| <b>TCR gene</b> | <b>TCR residues</b> | <b>CD1d residues</b>                       | <b>Bond type</b> |
|-----------------|---------------------|--------------------------------------------|------------------|
| CDR1 $\alpha$   | Gln31               | Trp160                                     | VDW              |
| CDR1 $\alpha$   | Tyr32               | Trp153                                     | VDW              |
| CDR1 $\alpha$   | Tyr32               | Trp160                                     | VDW              |
| CDR1 $\alpha$   | Tyr32-O $\eta$      | Thr157-O $\gamma$ 1, Trp160-N $\epsilon$ 1 | HB               |
| CDR2 $\alpha$   | Tyr57               | Glu156, Trp153                             | VDW              |
| CDR2 $\alpha$   | Ser58               | Glu156                                     | VDW              |
| CDR3 $\alpha$   | Leu110-O            | Asn62-O $\delta$ 1                         | HB               |
| CDR3 $\alpha$   | Leu110              | Thr165, Leu66, Thr65, Trp160               | VDW              |
| CDR3 $\alpha$   | Asn111-N $\delta$ 2 | Gln168-N $\epsilon$ 2                      | VDW, HB          |
| CDR3 $\alpha$   | Ala114              | Asn62, Gln61                               | VDW              |
| CDR3 $\alpha$   | Ala114-O            | Thr65-O $\gamma$ 1                         | HB               |
| FW $\alpha$     | Tyr55               | Trp153                                     | VDW              |
| FW $\alpha$     | Tyr55-O $\eta$      | Trp153-N $\epsilon$ 1                      | HB               |
| FW $\alpha$     | Lys82               | Glu156                                     | SB               |
| CDR2 $\beta$    | Ile61               | Glu64                                      | VDW              |
| CDR3 $\beta$    | Gly109              | His68                                      | VDW              |
| CDR3 $\beta$    | Pro110              | His68                                      | VDW              |
| CDR3 $\beta$    | Phe111              | Trp160                                     | VDW              |
| CDR3 $\beta$    | Phe111              | Ile69                                      | VDW              |
| <b>TCR gene</b> | <b>TCR residues</b> | <b><math>\alpha</math>-GalCer atoms</b>    | <b>Bond type</b> |
| CDR3 $\beta$    | Gln112              | O6A                                        | VDW              |
| CDR3 $\beta$    | Gln112              | C6A                                        | VDW              |

HB: Hydrogen bond, VDW: Van der Waals, SB: salt bridge. Cut-off at 4 Å for VDW interactions and 3.5 Å for HB. FW, framework
